# Supplementary material for: Ketamine induces multiple individually distinct whole-brain functional connectivity signatures
Source: eLife journal article supplement (doi:10.7554/elife.84173), 2024-03-11

|                                                                   | PC1    | PC2    |
|-------------------------------------------------------------------|--------|--------|
| 1 <i>Cognition - Spatial Working Memory</i>                       | -0.002 | 0.131  |
| 2 <i>PANSS P1 - Delusions</i>                                     | -0.157 | 0.330  |
| 3 <i>PANSS P2 - Conceptual Disorganization</i>                    | -0.267 | 0.024  |
| 4 <i>PANSS P3 - Hallucinations</i>                                | -0.022 | 0.335  |
| 5 <i>PANSS P4 - Excitement</i>                                    | -0.163 | 0.109  |
| 6 <i>PANSS P5 - Grandiosity</i>                                   | 0.023  | 0.262  |
| 7 <i>PANSS P6 - Suspiciousness/Persecution</i>                    | -0.069 | 0.033  |
| 8 <i>PANSS P7 - Hostility</i>                                     | -0.150 | -0.072 |
| 9 <i>PANSS N1 - Blunted Affect</i>                                | -0.249 | -0.062 |
| 10 <i>PANSS N2 - Emotional Withdrawal</i>                         | -0.295 | -0.081 |
| 11 <i>PANSS N3 - Poor Rapport</i>                                 | -0.086 | -0.302 |
| 12 <i>PANSS N4 - Passive/Apathetic Social Withdrawal</i>          | -0.266 | -0.130 |
| 13 <i>PANSS N5 - Difficulty in Abstract Thinking</i>              | -0.218 | 0.125  |
| 14 <i>PANSS N6 - Lack of Spontaneity and Flow of Conversation</i> | -0.277 | -0.152 |
| 15 <i>PANSS N7 - Stereotyped Thinking</i>                         | -0.159 | 0.129  |
| 16 <i>PANSS G1 - Somatic Concern</i>                              | -0.034 | 0.147  |
| 17 <i>PANSS G2 - Anxiety</i>                                      | -0.167 | 0.023  |
| 18 <i>PANSS G3 - Guilt Feelings</i>                               | -0.025 | 0.035  |
| 19 <i>PANSS G4 - Tension</i>                                      | -0.197 | -0.044 |
| 20 <i>PANSS G5 - Mannerisms and Posturing</i>                     | -0.132 | 0.040  |
| 21 <i>PANSS G6 - Depression</i>                                   | -0.137 | 0.140  |
| 22 <i>PANSS G7 - Motor Retardation</i>                            | -0.236 | -0.040 |
| 23 <i>PANSS G8 - Uncooperativeness</i>                            | -0.075 | -0.369 |
| 24 <i>PANSS G9 - Unusual Thought Content</i>                      | -0.126 | 0.305  |
| 25 <i>PANSS G10 - Disorientation</i>                              | -0.202 | 0.144  |
| 26 <i>PANSS G11 - Poor Attention</i>                              | -0.245 | -0.053 |
| 27 <i>PANSS G12 - Lack of Judgement and Insight</i>               | -0.256 | 0.043  |
| 28 <i>PANSS G13 - Disturbance of Volition</i>                     | -0.197 | -0.032 |
| 29 <i>PANSS G14 - Poor Impulse Control</i>                        | -0.059 | -0.362 |
| 30 <i>PANSS G15 - Preoccupation</i>                               | -0.142 | 0.219  |
| 31 <i>PANSS G16 - Active Social Avoidance</i>                     | -0.250 | -0.132 |

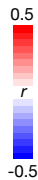

Supplement: fig4-figsupp1-data1 [file elife-84173-fig4-figsupp1-data1-v1.pdf]
