# Supplementary material for: Ketamine induces multiple individually distinct whole-brain functional connectivity signatures
Source: eLife journal article supplement (doi:10.7554/elife.84173), 2024-03-11
Supplement: supp1 [file elife-84173-supp1-v1.pdf]

| <b>Characteristic (N=40)</b> | <b>Pre Ketamine</b> |             | <b>Post Ketamine</b> |             | <b>P-Value</b> |
|------------------------------|---------------------|-------------|----------------------|-------------|----------------|
|                              | <b>Mean</b>         | <b>S.D.</b> | <b>Mean</b>          | <b>S.D.</b> |                |
| <b>PANSS Positive</b>        | 7.51                | 0.84        | 14.21                | 3.5         | <.001**        |
| <b>PANSS Negative</b>        | 7.95                | 1.03        | 14.57                | 5.49        | <.001**        |
| <b>PANSS General</b>         | 17.14               | 1.81        | 29.92                | 6.98        | <.001**        |
| <b>PANSS Total</b>           | 32.59               | 2.66        | 58.72                | 14.27       | <.001**        |
| <b>CADSS</b>                 | 0.1                 | 0.38        | 16.78                | 10.32       | <.001**        |
| <b>BDI</b>                   | 1.38                | 1.93        | 0.76                 | 1.53        | 0.21           |
