# Supplementary material for: Ketamine induces multiple individually distinct whole-brain functional connectivity signatures
Source: eLife journal article supplement (doi:10.7554/elife.84173), 2024-03-11
Supplement: supp2 [file elife-84173-supp2-v1.pdf]

| <b>Characteristic</b>                | <b>Healthy Participants (N=40)</b> |             |
|--------------------------------------|------------------------------------|-------------|
|                                      | <b>Mean</b>                        | <b>S.D.</b> |
| <b>Age (years)</b>                   | 25.73                              | 3.74        |
| <b>Gender (% male)</b>               | 0.73                               | -           |
| <b>Participant Education (years)</b> | 16.67                              | 1.77        |
| <b>Maternal Education (years)</b>    | 14.55                              | 2.57        |
| <b>Paternal Education (years)</b>    | 15.03                              | 3.09        |
| <b>Smoking (% smokers)</b>           | 0.03                               | -           |
| <b>Handedness (% right)</b>          | 0.85                               | -           |
| <b>Race (%)</b>                      | Asian: 12.5%                       |             |
|                                      | Black: 22.5%                       |             |
|                                      | White: 55%                         |             |
|                                      | Mixed: 7.2%                        |             |
|                                      | Not Specified: 2.5%                |             |
