# Supplementary material for: Ketamine induces multiple individually distinct whole-brain functional connectivity signatures
Source: eLife journal article supplement (doi:10.7554/elife.84173), 2024-03-11
Supplement: supp3 [file elife-84173-supp3-v1.pdf]

**Participant****PANSS Total**

Paired T-Test (Ketamine vs. Placebo)

---

|    |    |
|----|----|
| 1  | *  |
| 2  | *  |
| 3  | *  |
| 4  | *  |
| 5  | *  |
| 6  | *  |
| 7  | *  |
| 8  | *  |
| 9  | *  |
| 10 | *  |
| 11 | *  |
| 12 | *  |
| 13 | *  |
| 14 | *  |
| 15 | *  |
| 16 | *  |
| 17 | *  |
| 18 | *  |
| 19 | *  |
| 20 | *  |
| 21 | *  |
| 22 | *  |
| 23 | ns |
| 24 | *  |
| 25 | *  |
| 26 | *  |
| 27 | *  |
| 28 | *  |
| 29 | *  |
| 30 | *  |
| 31 | *  |
| 32 | *  |
| 33 | ns |
| 34 | ns |
| 35 | *  |
| 36 | *  |
| 37 | ns |
| 38 | *  |
| 39 | *  |
| 40 | ns |
