# Supplementary material for: Ketamine induces multiple individually distinct whole-brain functional connectivity signatures
Source: eLife journal article supplement (doi:10.7554/elife.84173), 2024-03-11
Supplement: supp4 [file elife-84173-supp4-v1.pdf]

**Behavioral Item****Number of Outliers** $<Q1-1.5*IQR / >Q3+1.5*IQR$ 

---

|           |    |
|-----------|----|
| Cognition | 1  |
| PANSS P1  | 0  |
| PANSS P2  | 1  |
| PANSS P3  | 1  |
| PANSS P4  | 2  |
| PANSS P5  | 1  |
| PANSS P6  | 0  |
| PANSS P7  | 6* |
| PANSS N1  | 0  |
| PANSS N2  | 0  |
| PANSS N3  | 8* |
| PANSS N4  | 0  |
| PANSS N5  | 1  |
| PANSS N6  | 0  |
| PANSS N7  | 3  |
| PANSS G1  | 3  |
| PANSS G2  | 0  |
| PANSS G3  | 9* |
| PANSS G4  | 1  |
| PANSS G5  | 0  |
| PANSS G6  | 8* |
| PANSS G7  | 1  |
| PANSS G8  | 4* |
| PANSS G9  | 0  |
| PANSS G10 | 4* |
| PANSS G11 | 1  |
| PANSS G12 | 1  |
| PANSS G13 | 0  |
| PANSS G14 | 3* |
| PANSS G15 | 4* |
| PANSS G16 | 1  |
